# Supplementary material
Source: publisher figshare collection journal article supplement (https://sage.figshare.com/ndownloader/files/20333424)
Supplement: Supplementary file 1 [file 20333424]

**Supplementary figure S2. Main reason to switch DMT by EDSS score subgroup**

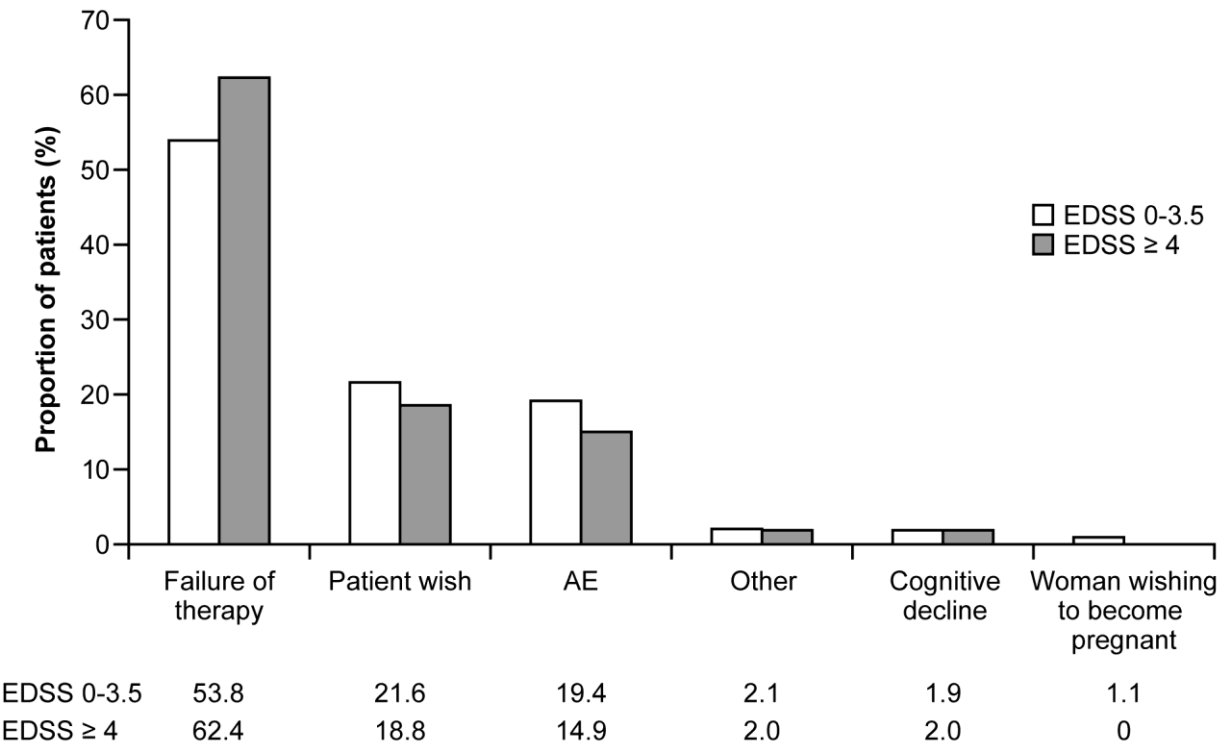

| EDSS score subgroup              | Patient number |          |         |
|----------------------------------|----------------|----------|---------|
|                                  | EDSS 0-3.5     | EDSS ≥ 4 | Missing |
|                                  | N=468          | N=101    | N=26    |
| Failure of therapy               | 252            | 63       | 6       |
| Patient wish                     | 101            | 19       | 13      |
| AE                               | 91             | 15       | 7       |
| Other                            | 10             | 2        | 0       |
| Cognitive decline                | 9              | 2        | 0       |
| Woman wishing to become pregnant | 5              | 0        | 0       |

Data were recorded retrospectively using medical charts.

AE, adverse event; EDSS, Expanded Disability Status Scale.
